# Supplementary material
Source: PubMed Central journal article supplement (PMC4959317)

1 **Supplementary Material to**

2  
3 Intercellular communication between keratinocytes and fibroblasts  
4 induces local osteoclast differentiation: a mechanism underlying  
5 cholesteatoma-induced bone destruction

6 Yoriko Iwamoto<sup>a,b,c</sup>, Keizo Nishikawa<sup>b,c,d</sup>, Ryusuke Imai<sup>a,e</sup>, Masayuki Furuya<sup>b,c,e</sup>, Maki Uenaka<sup>b,c</sup>,  
7 Yumi Ohta<sup>a</sup>, Tetsuo Morihana<sup>a</sup>, Saori Itoi-Ochi<sup>c</sup>, Josef M. Penninger<sup>g</sup>, Ichiro Katayama<sup>e</sup>, Hidenori  
8 Inohara<sup>a</sup> and Masaru Ishii<sup>b,c,d</sup>

9  
10 Department of Otorhinolaryngology-Head and Neck Surgery, Graduate School of Medicine,  
11 Osaka University, Osaka, Japan<sup>a</sup>; Department of Immunology and Cell Biology, Graduate School  
12 of Medicine and Frontier Biosciences, Osaka University, Osaka, Japan<sup>b</sup>; WPI-Immunology  
13 Frontier Research Center, Osaka University, Osaka, Japan<sup>c</sup>; JST, CREST, Tokyo, Japan<sup>d</sup>;  
14 Department of Dermatology, Graduate School of Medicine, Osaka University, Osaka, Japan<sup>e</sup>;  
15 Department of Orthopedic Surgery, Graduate School of Medicine, Osaka University, Osaka,  
16 Japan<sup>f</sup>; Institute of Molecular Biotechnology, Austrian Academy of Sciences, Vienna, Austria<sup>g</sup>

17  
18  
19 **Table of contents**

20 **Pages 2-3**            **Supplementary Figure Legends**

21 **Pages 4-**            **Supplementary Figures**

22  
23  
24  
25

26

27 **Supplementary figure legend**

28

29 **Supplementary Figure 1**

30 **Time-course analysis of epidermal cyst-like tissue.**

31 (A) Confocal images of calvarial sections from WT mice injected with EGFP-expressing  
32 keratinocytes and CAG-EGFP-expressing fibroblasts at 2 and 4 days after injection. Scale bar; 250  
33 mm. Representative images of three mice are shown. (B) The width and the thickness of epidermal  
34 cyst-like tissue at each time period.

35

36 **Supplementary Figure 2**

37 **Expression of keratinocyte differentiation markers in normal mouse ear pinna and**  
38 **epidermal cyst-like tissue.**

39 Immunohistochemical analysis of normal mouse ear pinna (upper) and epidermal cyst-like tissue  
40 (lower) using anti-CK14 (left) or anti-CK10 antibodies (right). No significant staining was  
41 observed in a specific isotype-matched negative control (left). Representative images of three mice  
42 are shown.

43

44 **Supplementary Figure 3**

45 **Expression of RANKL in epidermal cyst-like tissue and normal dermal tissues.**

46 (A) RANKL expression in normal dermla tissues, normal mouse skin (left) and ear pinna (right.)  
47 Isotype matched control (lower) and anti-RANKL antibody (upper). Red-boxed regions in the left

48 images are magnified in the right images. Arrowheads indicate RANKL-expressing cells. Arrows  
49 indicate melanocytes. (B) RANKL expression in epidermal cyst-like tissues at 2, 4 and 7 days  
50 after injection (right). No significant staining was observed in a specific isotype-matched negative  
51 control (left). Scale bar, 200  $\mu$ m. Representative images of three mice are shown.

52

53

#### 54 **Supplementary Figure 4**

##### 55 **Effect of cytokines secreted from keratinocytes on *Tnfsf11* mRNA expression in fibroblasts.**

56 (A) Effect of LPS and supernatant from keratinocyte culture on *Tnfsf11* mRNA expression in ear  
57 pinna-derived fibroblasts, measured by RT-qPCR analysis. Relative expression to fibroblasts  
58 cultured in fresh media without LPS. (B) Relative mRNA expression of *Lgals3*, *Plau*, *Slpi* and  
59 *Vegfa*, *Grn* (encoding Progranulin), *Il9* (encoding IL-9), *Cxcl1* (encoding CXCL-1), *Csf3*  
60 (encoding G-CSF) and *Cxcl16* (encoding CXCL-16) in ear-pinna derived fibroblasts and  
61 keratinocytes. Data are presented as mean  $\pm$  SD. (one-way ANOVA in A)

62

# Supplementary Figure 1

A

Day 2

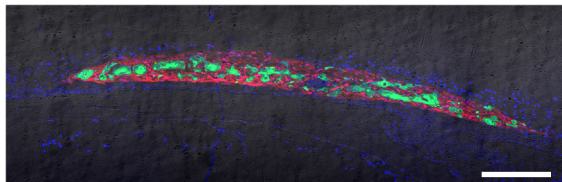

Day 4

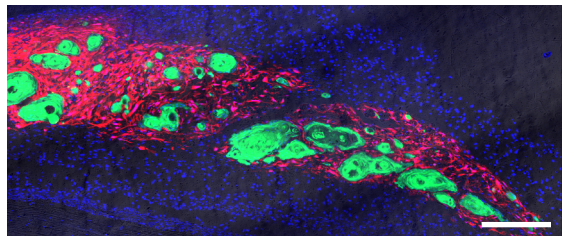

B

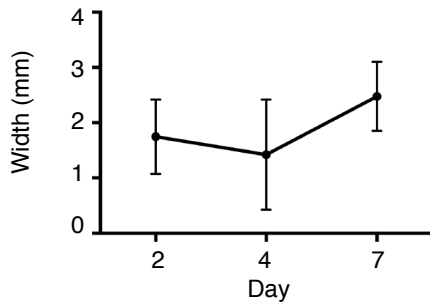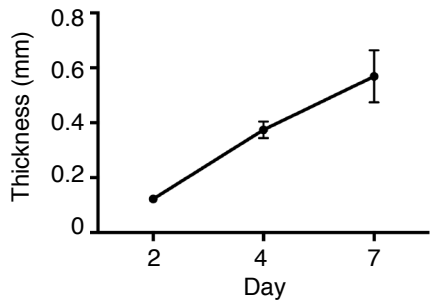



## Supplementary Figure 2

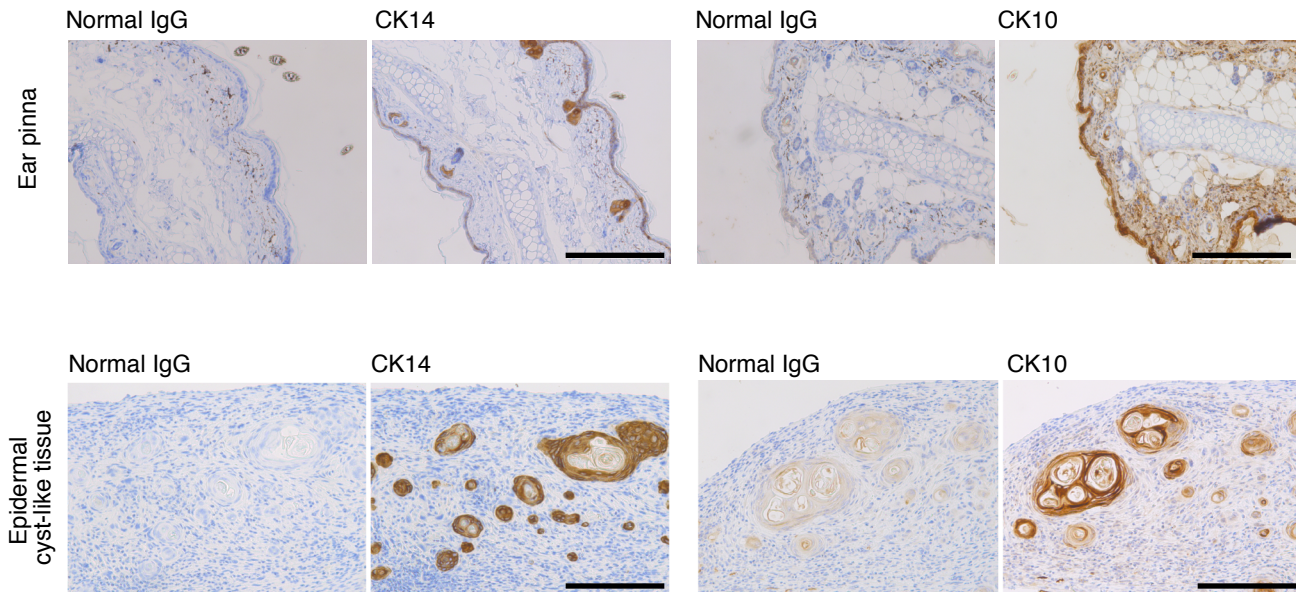

# Supplementary Figure 3

## A

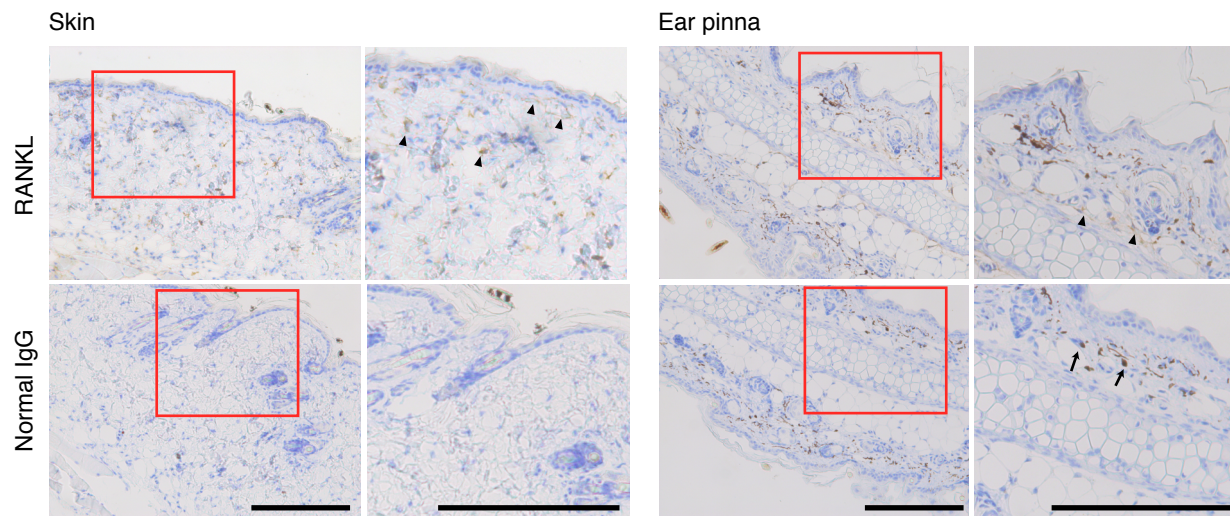

## B

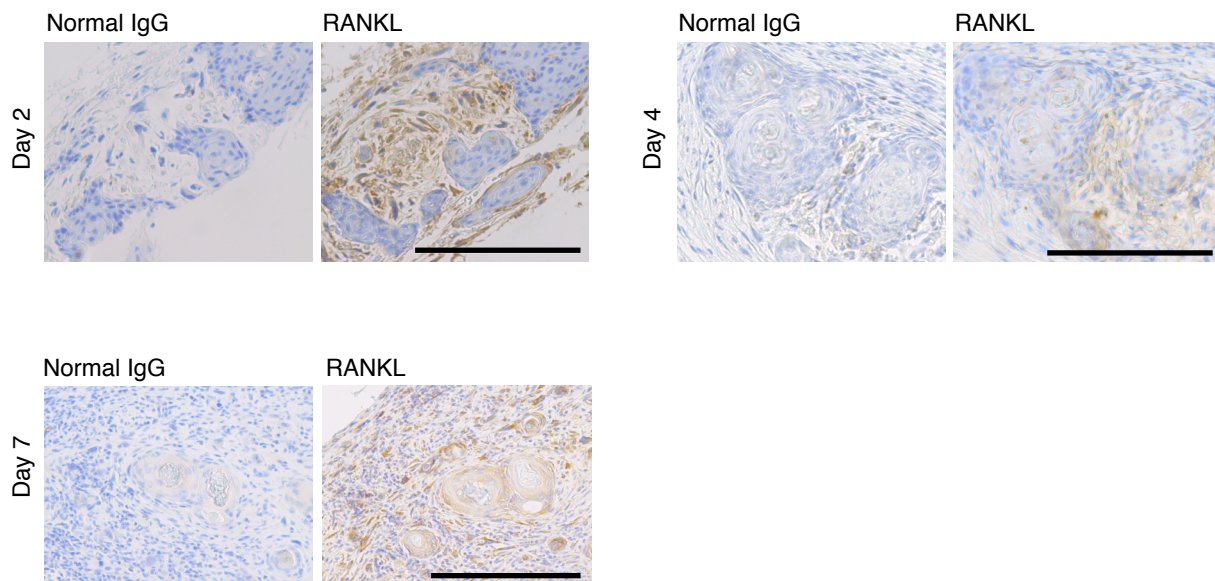

# Supplementary Figure 4

A

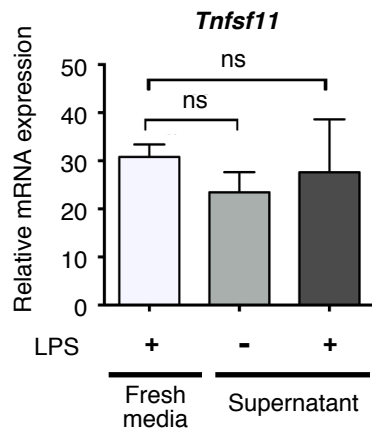

B

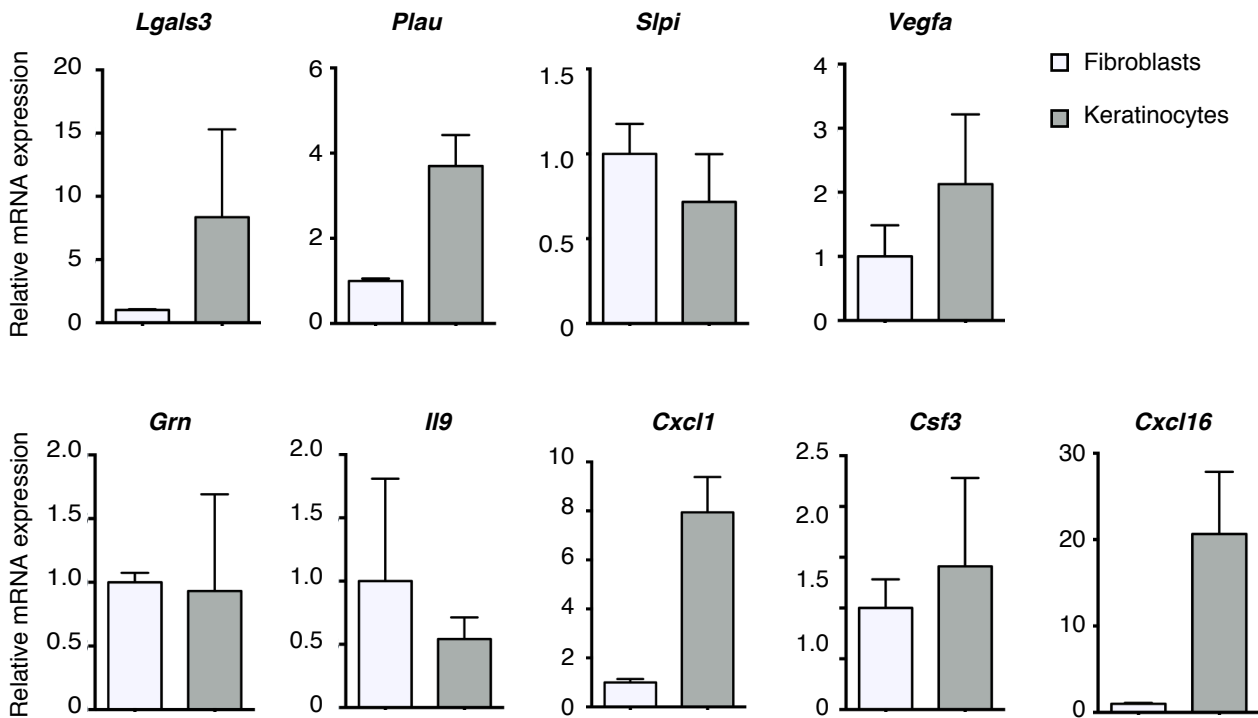

Supplement: MCB.01028-15_zmb999101228so1.pdf [file MCB.01028-15_zmb999101228so1.pdf]
